# Supplementary material for: DNA Fragmentation in Viable and Non-Viable Spermatozoa Discriminates Fertile and Subfertile Subjects with Similar Accuracy
Source: PubMed Central journal article supplement (PMC7290809; doi:10.3390/jcm9051341), 2020-05-04
Supplement: jcm-09-01341-s001.pdf [file jcm-09-01341-s001.pdf]

**Table S1.** Binary logistic regression model with total sDF (Table 1A) or viable sDF (Table 1B) or non-viable sDF (Table 1C), and age, abstinence, sperm number, sperm progressive motility and sperm morphology as introduced variables. State variable was fertile vs. subfertile status.

| <b>Table 1A</b>                  |     | <b>OR</b> | <b>95% CI</b> | <b><i>p</i> Value</b> |
|----------------------------------|-----|-----------|---------------|-----------------------|
| Total sDF                        |     | 1.03      | 1.01-1.06     | 0.013                 |
| Sperm Number, millions/ejaculate | <39 | 1 (ref.)  | -             | -                     |
|                                  | ≥39 | 1.47      | 0.31-6.92     | 0.622                 |
| Progressive Motility, %          | <32 | 1(ref.)   | -             | -                     |
|                                  | ≥32 | 4.32      | 1.10-17.00    | 0.036                 |
| Morphology, %                    | <4  | 1(ref.)   | -             | -                     |
|                                  | ≥4  | 2.79      | 1.18-6.58     | 0.019                 |
| Age, y                           | <38 | 1(ref.)   | -             | -                     |
|                                  | ≥38 | 0.48      | 0.23-0.99     | 0.047                 |
| Abstinence, d                    |     | 1.30      | 1.05-1.63     | 0.018                 |

| <b>Table 1B</b>                  |     | <b>OR</b> | <b>95% CI</b> | <b><i>p</i> Value</b> |
|----------------------------------|-----|-----------|---------------|-----------------------|
| Viable sDF                       |     | 1.06      | 1.03-1.10     | <0.001                |
| Sperm Number, millions/ejaculate | <39 | 1 (ref.)  | -             | -                     |
|                                  | ≥39 | 1.51      | 0.31-7.34     | 0.608                 |
| Progressive Motility, %          | <32 | 1(ref.)   | -             | -                     |
|                                  | ≥32 | 4.96      | 1.23-20.01    | 0.024                 |
| Morphology, %                    | <4  | 1(ref.)   | -             | -                     |
|                                  | ≥4  | 3.32      | 1.36-8.06     | 0.008                 |
| Age, y                           | <38 | 1(ref.)   | -             | -                     |
|                                  | ≥38 | 0.49      | 0.23-1.05     | 0.065                 |
| Abstinence, d                    |     | 1.33      | 1.06-1.66     | 0.014                 |

| <b>Table 1C</b>                  |     | <b>OR</b> | <b>95% CI</b> | <b><i>p</i> Value</b> |
|----------------------------------|-----|-----------|---------------|-----------------------|
| Non-viable sDF                   |     | 1.07      | 1.04-1.10     | <0.001                |
| Sperm Number, millions/ejaculate | <39 | 1 (ref.)  | -             | -                     |
|                                  | ≥39 | 1.35      | 0.25-7.23     | 0.722                 |
| Progressive Motility, %          | <32 | 1(ref.)   | -             | -                     |
|                                  | ≥32 | 8.14      | 1.62-40.89    | 0.011                 |
| Morphology, %                    | <4  | 1(ref.)   | -             | -                     |
|                                  | ≥4  | 3.21      | 1.27-8.10     | 0.013                 |
| Age, y                           | <38 | 1(ref.)   | -             | -                     |
|                                  | ≥38 | 0.51      | 0.24-1.10     | 0.087                 |
| Abstinence, d                    |     | 1.21      | 0.96-1.53     | 0.112                 |
